# Supplementary material for: Mn3O4/CuOxheterostructure for nitrate electroreduction to ammonia
Source: Royal Society of Chemistry journal article supplement (doi:10.1039/d3cc00704a), 2023-01-01
Supplement: d3cc00704a1.pdf [file d3cc00704a1.pdf]

## Electronic Supplementary Information

### Experimental Section

#### Materials

Copper foil (CF), manganese acetate ( $\text{Mn}(\text{CH}_3\text{COO})_2$ ), anhydrous sodium sulfate ( $\text{Na}_2\text{SO}_4$ ), sodium nitrate ( $\text{NaNO}_3$ ), sodium nitrite ( $\text{NaNO}_2$ ), ammonium chloride ( $\text{NH}_4\text{Cl}$ ), 0.8 wt% sulfamic acid ( $\text{H}_3\text{NO}_3\text{S}$ ), P-aminobenzenesulfonamide, N-(1-Naphthyl) ethylenediamine dihydrochloride, Nessler's reagent, and potassium sodium tartrate were purchased from Aladdin Chemical Reagent Co., Ltd. (Shanghai, China).  $^{15}\text{NH}_4\text{Cl}$  and  $\text{Na}^{15}\text{NO}_3$  were purchased from MacLin Biochemical Co., Ltd. (Shanghai, China). Hydrochloric acid (HCl) and phosphoric acid ( $\text{H}_3\text{PO}_4$ ) were purchased from Tianjin Fengchuan Chemical Reagent Co, Ltd. All chemicals are analytical grade and used without further purification.

#### Synthesis of $\text{Mn}_3\text{O}_4/\text{CuO}_x/\text{CF}$

The CF was ultrasonically cleaned with acetone, ethanol, and deionized (DI) water for 5 min, respectively, and then dried with  $\text{N}_2$  flow. Finally, the CF ( $1 \times 2.5 \text{ cm}^2$ ) was calcined at  $400 \text{ }^\circ\text{C}$  for 3 h under air atmosphere. The sample was gradually cooled down to room temperature for further use. Then an electrodeposition solution containing 55 mM manganese acetate and 55 mM anhydrous sodium sulfate was prepared. During the electrodeposition process, a three-electrode system was used, with the heat-treated CF as the working electrode, graphite rod as the counter electrode and saturated calomel electrode (SCE) as the reference electrode. The working electrode was deposited at a constant potential of  $-1.5 \text{ V}$  vs. SCE for 120 s. Finally, the products were rinsed with DI water and dried to obtain  $\text{Mn}_3\text{O}_4/\text{CuO}_x/\text{CF}$ .

#### Synthesis of $\text{Mn}_3\text{O}_4/\text{CF}$

The preparation method was similar to  $\text{Mn}_3\text{O}_4/\text{CuO}_x/\text{CF}$ , except CF was used as the working electrode.

#### Synthesis of $\text{CuO}_x/\text{CF}$

The preparation method was similar to  $\text{Mn}_3\text{O}_4/\text{CuO}_x/\text{CF}$ , except manganese acetate was

not added to the electrodeposition solution.

### **Characterizations**

The scanning electron microscope (SEM) images were taken with a Hitachi S4800. The transmission electron microscopy (TEM), high-resolution transmission electron microscopy (HR-TEM), and high-angle annular dark-field scanning transmission electron microscopy (HAADF-STEM) and energy-dispersive X-ray spectroscopy (EDX) images were obtained from JEOL JEM-2100. The X-ray diffraction (XRD) was recorded with a Bruker D8 Advance A25 System ( $\lambda = 0.15468$  nm). X-ray photoelectron spectroscopy (XPS) spectra were performed on a ThermoFisher K-alpha system using monochromatic Al K $\alpha$  radiation. All binding energies were referenced to the C 1s peak at 284.8 eV. Ultraviolet photoelectron spectroscopy (UPS) measurements were carried out under a monochromatic light source of He I (21.2 eV). Electron paramagnetic resonance (EPR) spectra were obtained from the Bruker A300 to detect oxygen vacancies. The ultraviolet-visible (UV-Vis) absorbance spectra were measured by a Thermo evolution 300 spectrophotometer. The isotope labeling experiments were measured using  $^1\text{H}$  NMR (Bruker AVANCE AV 400MHz system).

### **Electrochemical measurements**

Measurements for electrocatalytic reduction of nitrate to ammonia were performed in an H-type electrolytic cell separated by a Nafion 117 membrane using a CHI760E electrochemical workstation (Chen Hua, Shanghai). A three-electrode system was composed of the prepared  $\text{Mn}_3\text{O}_4/\text{CuO}_x/\text{CF}$ ,  $\text{CuO}_x/\text{CF}$  and  $\text{Mn}_3\text{O}_4/\text{CF}$  working electrodes (effective surface area:  $1 \times 1$  cm $^2$ ), SCE reference electrode and platinum foil counter electrode. 0.5 M  $\text{Na}_2\text{SO}_4$  solution was evenly distributed to the cathode and anode compartments, and  $\text{NaNO}_3$  (containing 200 ppm of  $\text{NO}_3^-$ -N) was added to the cathode compartment for electroreduction. Linear sweep voltammetry (LSV) curves were performed at a scan rate of 10 mV s $^{-1}$  in the above electrolyte until the polarization curves reached a steady state. Then, under different potentials, potentiostatic tests for 2 h were performed to evaluate the electrocatalytic performance. Electrochemical impedance spectroscopy (EIS) was recorded in the 0.5 M  $\text{Na}_2\text{SO}_4$  solution containing 200 ppm of  $\text{NO}_3^-$ -N, varying the frequency from 100 kHz to 0.1 Hz, with an amplitude of 5 mV. The

potential was converted to reversible hydrogen electrode (RHE) potential by the Nernst equation:  $E(\text{vs. RHE}) = E(\text{vs. SCE}) + 0.242 + 0.0591 \text{ pH}$ .

### **Determination of ion concentration**

**Determination of  $\text{NO}_3^-$ -N:** Firstly, 0.02 ml electrolyte after electroreduction process was collected and diluted to 5 ml to keep within the detection range. Then, 0.1 mL 1 M HCl and 0.01 mL 0.8 wt% sulfamic acid were added into the above diluted solution and left to stand for 20 min. The absorption spectrum was determined using an ultraviolet-visible (UV-Vis) spectrophotometry, and the absorbances at 220 nm and 275 nm were recorded. According to the equation  $A = A_{220\text{nm}} - 2A_{275\text{nm}}$ , the final absorbance was obtained.

Concentration-absorbance curve was calibrated with a series of  $\text{NaNO}_3$  standard solutions. **Determination of  $\text{NO}_2^-$ -N:** P-aminobenzenesulfonamide (4 g), N-(1-Naphthyl) ethylenediamine dihydrochloride (0.2 g) and phosphoric acid (10 mL,  $\rho = 1.70 \text{ g/mL}$ ) were dissolved in 50 mL ultrapure water to prepare the color reagent. 0.1 ml electrolyte was removed from the electrolytic cell and diluted to 5 ml to keep within the detection range. The color reagent (100  $\mu\text{L}$ ) was mixed into the above diluted electrolyte and left to stand for 20 min, and the absorbance at a wavelength of 540 nm was recorded. Concentration-absorbance curve was calibrated with a series of  $\text{NaNO}_2$  standard solutions.

**Determination of  $\text{NH}_3$ -N:** The Nessler reagent was applied as a color reagent to determine the ammonia produced by nitrate reduction. Firstly, 0.1 ml electrolyte after electroreduction process was collected and diluted to 5 ml to keep within the detection range. Then, 0.1 mL potassium sodium tartrate solution ( $\rho=500 \text{ g/L}$ ) and 0.1 mL Nessler's reagent were added to the above diluted electrolyte. After sitting for 20 min, the absorbance at a wavelength of 420 nm was recorded. Concentration-absorbance curve was calibrated with a series of  $\text{NH}_4\text{Cl}$  standard solutions.

### **Isotope labeling experiments**

The nitrate reduction isotope labeling experiments were carried out to clarify the ammonia source and quantify the concentration of ammonia using  $\text{Na}^{15}\text{NO}_3$  (99%) as the N-source. 0.5 M  $\text{Na}_2\text{SO}_4$  solution containing  $^{15}\text{NO}_3^-$ - $^{15}\text{N}$  (200 ppm) was added into the cathode compartment for electroreduction. After that, the electrolyte solution containing  $^{15}\text{NH}_4^+$ - $^{15}\text{N}$  was extracted, and the pH was adjusted to weak acid with 4 M  $\text{H}_2\text{SO}_4$ . For

further quantification of the ammonia concentration, the calibration curve was obtained by  $^1\text{H}$  NMR (600 MHz) with an external standard of maleic acid. The method was as follows: First, different concentrations of  $^{15}\text{NH}_4^+$ - $^{15}\text{N}$  solutions (50, 100, 150, 200, 250 ppm) and 0.02 g maleic acid were added into 0.5 M  $\text{Na}_2\text{SO}_4$ ; Second, 50  $\mu\text{L}$  deuterium oxidized ( $\text{D}_2\text{O}$ ) was added in 0.5 mL above mixed solution for the NMR detection; Third, the calibration curve was obtained by using the peak area ratio between  $^{15}\text{NH}_4^+$ - $^{15}\text{N}$  and maleic acid. Similarly, the amount of  $^{14}\text{NH}_4^+$ - $^{14}\text{N}$  was quantified by this method when  $\text{Na}^{14}\text{NO}_3$  was used as the feeding N-source.

### Calculation of the yield, conversion rate, selectivity, and Faraday efficiency

For nitrate electroreduction, the  $\text{NH}_3$  yield was calculated by Eq. S1:

$$\text{Yield} = (c_{\text{NH}_3} \times V) / (M_{\text{NH}_3} \times t \times S) \quad \text{Eq. S1}$$

The conversion rate of  $\text{NO}_3^-$  (i.e. percentage of  $\text{NO}_3^-$  concentration participating in the electrochemical reduction reaction to the original  $\text{NO}_3^-$  concentration) was calculated by Eq. S2:

$$\text{Conversion rate} = \Delta c_{\text{NO}_3^-} / c_0 \times 100\% \quad \text{Eq. S2}$$

The selectivity of  $\text{N}_2$ ,  $\text{NH}_3$  and  $\text{NO}_2^-$  (i.e. the percentage of product concentration to  $\text{NO}_3^-$  concentration participating in the electrochemical reduction reaction) was calculated by Eq. S3:

$$\text{Selectivity} = c / \Delta c_{\text{NO}_3^-} \times 100\% \quad \text{Eq. S3}$$

The Faraday efficiency was calculated by Eq. S4:

$$\text{Faraday efficiency} = (8 F \times c_{\text{NH}_3} \times V) / (M_{\text{NH}_3} \times Q) \times 100\% \quad \text{Eq. S4}$$

Where  $c_{\text{NH}_3}$  is the concentration of  $\text{NH}_3$  (aq),  $\Delta c_{\text{NO}_3^-}$  is the concentration difference of  $\text{NO}_3^-$  before and after electrolysis,  $c_0$  is the initial concentration of  $\text{NO}_3^-$ ,  $c$  is the concentration of generated nitrogen, ammonia or nitrite, and  $V$  is the electrolyte volume in the cathode compartment (45 mL),  $M_{\text{NH}_3}$  is the molar mass of  $\text{NH}_3$ ,  $t$  is the electrolysis time (2 h),  $S$  is the area of the working electrode (1  $\text{cm}^2$ ),  $F$  is the Faraday constant (96485  $\text{C mol}^{-1}$ ), and  $Q$  is the total charge passing the electrode.

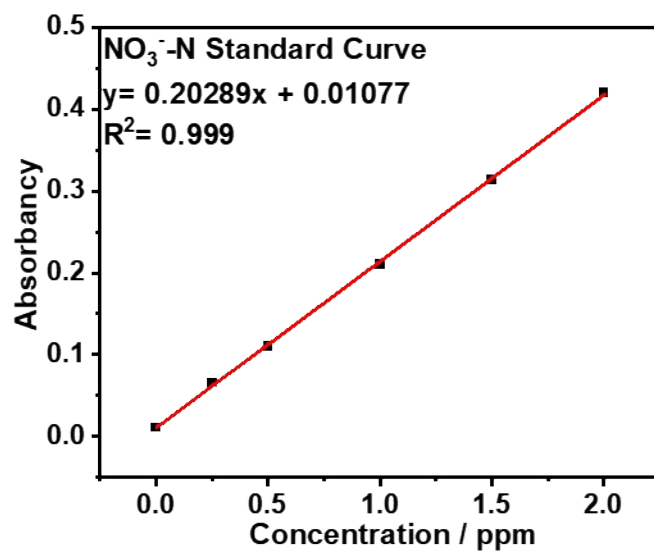

Fig. S1. Calibration curve of NO<sub>3</sub><sup>-</sup>-N with good linearity.

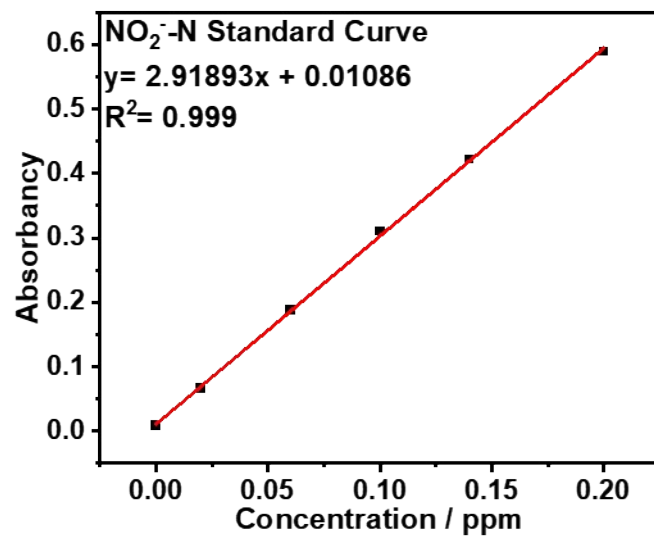

Fig. S2. Calibration curve of NO<sub>2</sub><sup>-</sup>-N with good linearity.

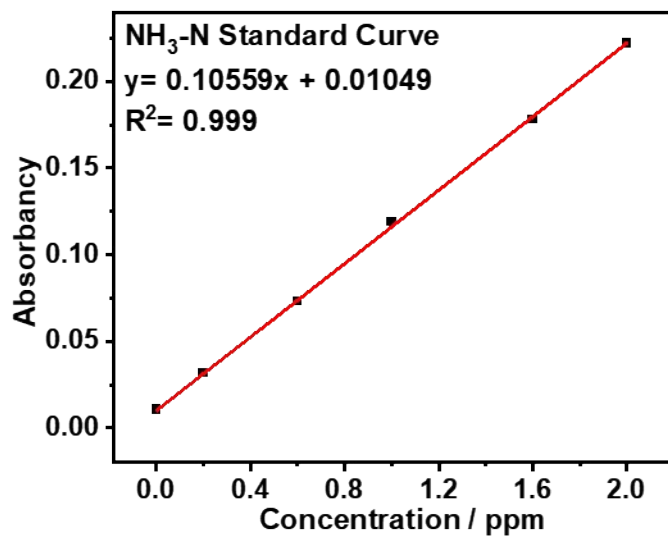

Fig. S3. Calibration curve of NH<sub>3</sub>-N with good linearity.

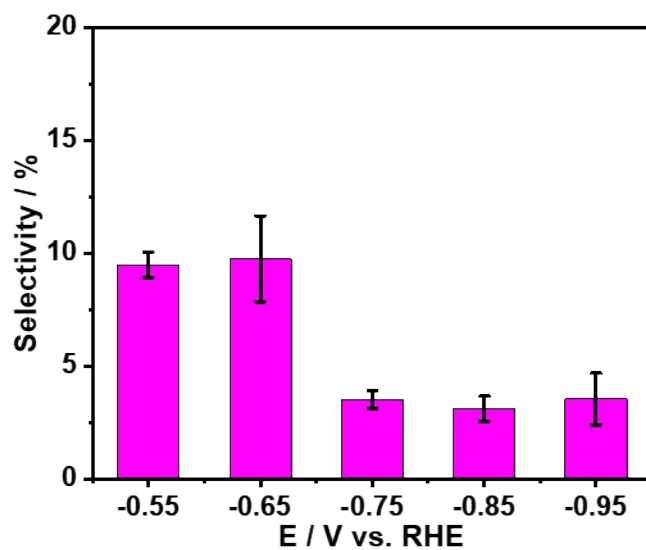

Fig. S4. Selectivity of NO<sub>2</sub><sup>-</sup> for Mn<sub>3</sub>O<sub>4</sub>/CuO<sub>x</sub>/CF measured for 2 h under various potentials.

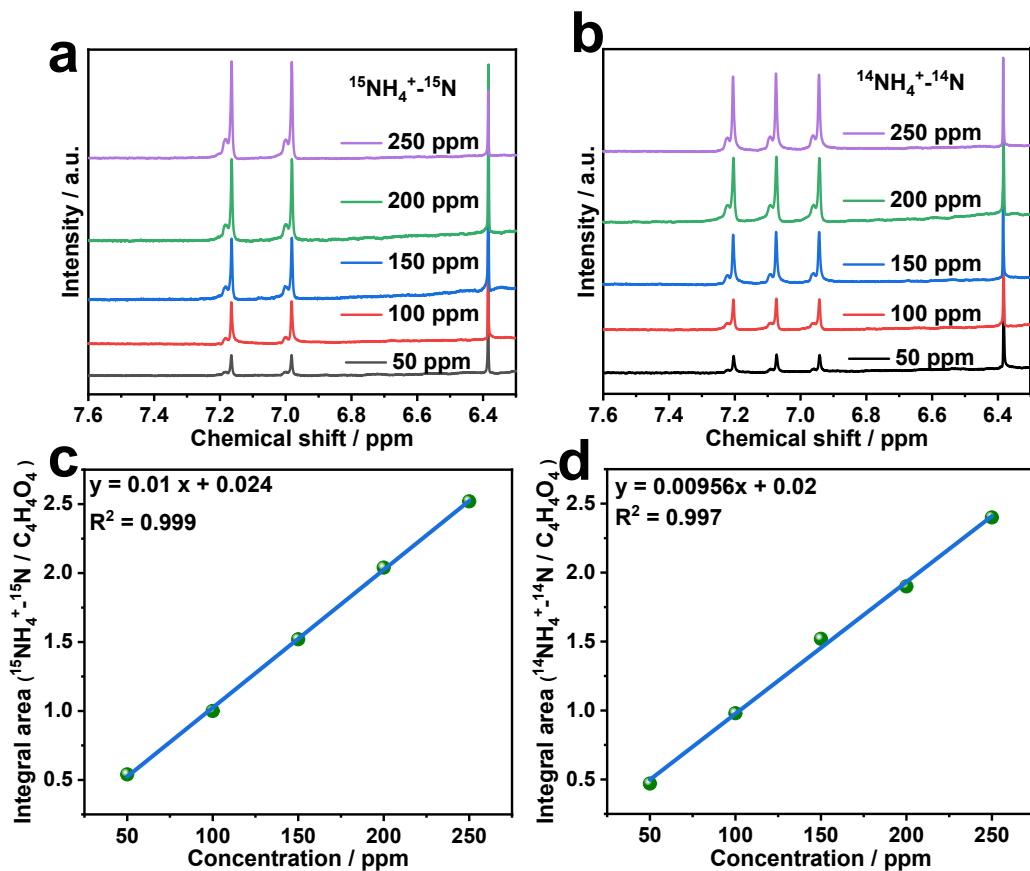

**Fig. S5.**  $^1\text{H}$  NMR spectra of (a)  $^{15}\text{NH}_4^+ - ^{15}\text{N}$  and (b)  $^{14}\text{NH}_4^+ - ^{14}\text{N}$  with different concentrations. (c) The standard curve of integral area ( $^{15}\text{NH}_4^+ - ^{15}\text{N} / \text{C}_4\text{H}_4\text{O}_4$ ) against  $^{15}\text{NH}_4^+ - ^{15}\text{N}$  concentration. (d) The standard curve of integral area ( $^{14}\text{NH}_4^+ - ^{14}\text{N} / \text{C}_4\text{H}_4\text{O}_4$ ) against  $^{14}\text{NH}_4^+ - ^{14}\text{N}$  concentration.

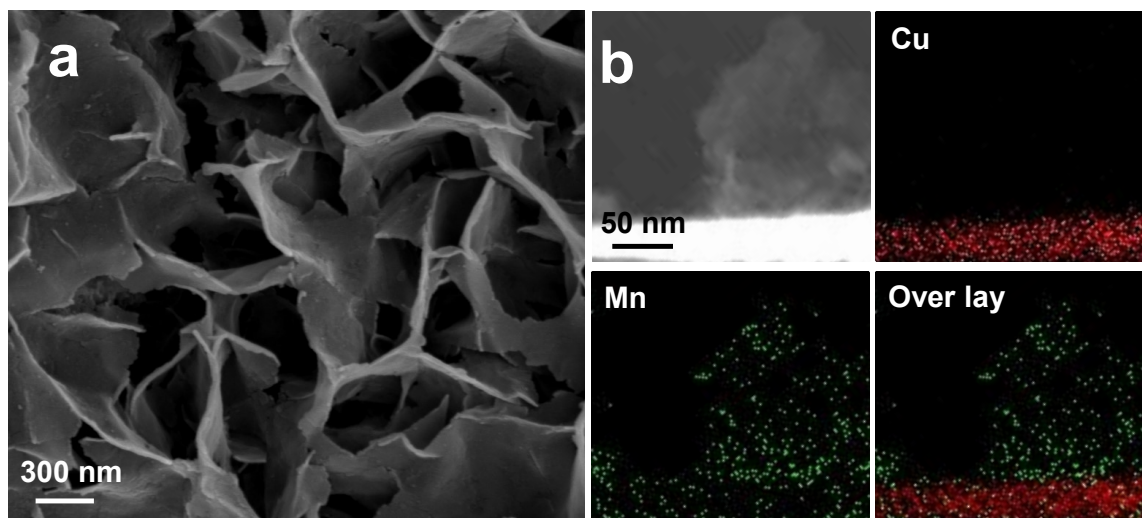

**Fig. S6.** (a) SEM image and (b) HAADF-STEM image and EDX mapping images of  $\text{Mn}_3\text{O}_4/\text{CuO}_x/\text{CF}$  after seven cycle tests.

The crossed nanosheet structure and the boundary between the Cu and Mn elements still existed, which proved that the heterostructure could be well preserved after 7 consecutive cycles. (Fig. S6).

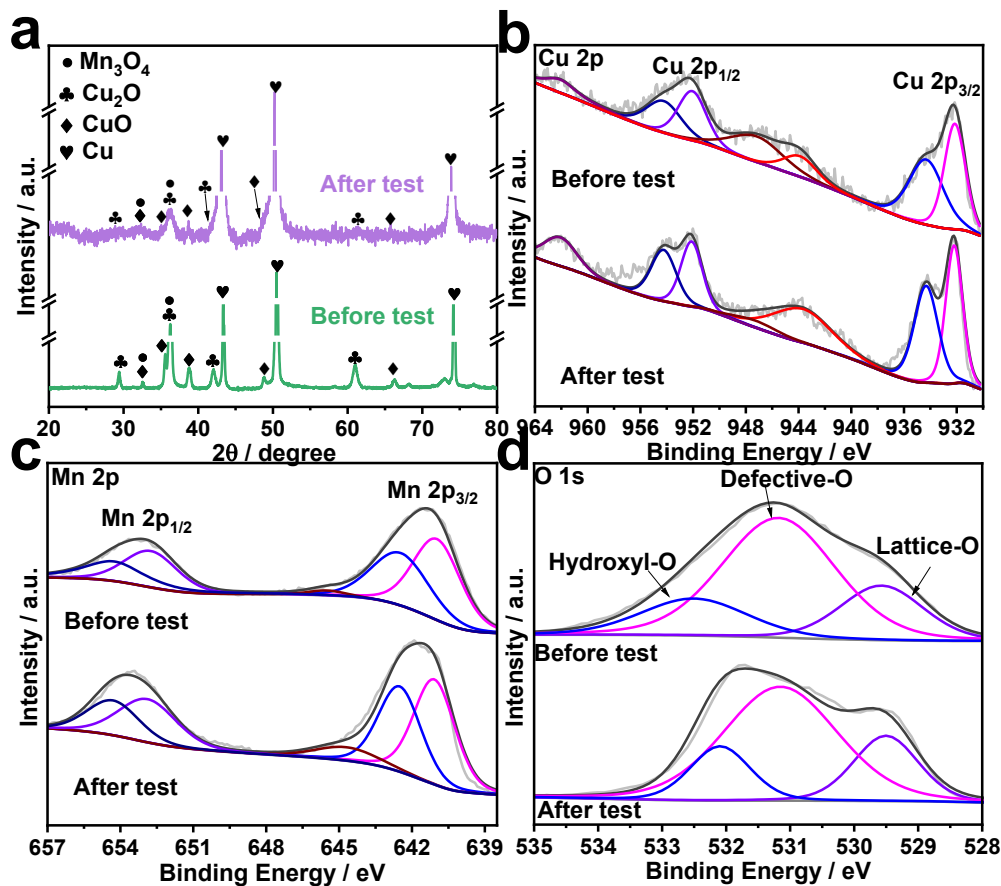

**Fig. S7.** (a) XRD patterns, (b) Cu 2p XPS spectra, (c) Mn 2p XPS spectra and (d) O 1s XPS spectra of Mn<sub>3</sub>O<sub>4</sub>/CuO<sub>x</sub>/CF before and after test.

In addition, the XRD and XPS characterization results were shown in Fig. S8. Compared with the XRD before the stability testing, the crystallinity of the catalyst decreased. However, the Cu 2p XPS and Mn 2p XPS of Mn<sub>3</sub>O<sub>4</sub>/CuO<sub>x</sub>/CF showed no apparent change before and after the cycle tests. Moreover, the O 1s spectra of Mn<sub>3</sub>O<sub>4</sub>/CuO<sub>x</sub>/CF exhibited that the area percentage of the Defective-O peak after the cycles was not significantly changed (before the reaction: Defective-O/Total-O = 0.62, after 7 consecutive cycles: Defective-O/Total-O = 0.63). These results demonstrated that Mn<sub>3</sub>O<sub>4</sub>/CuO<sub>x</sub>/CF had good electrocatalytic stability.



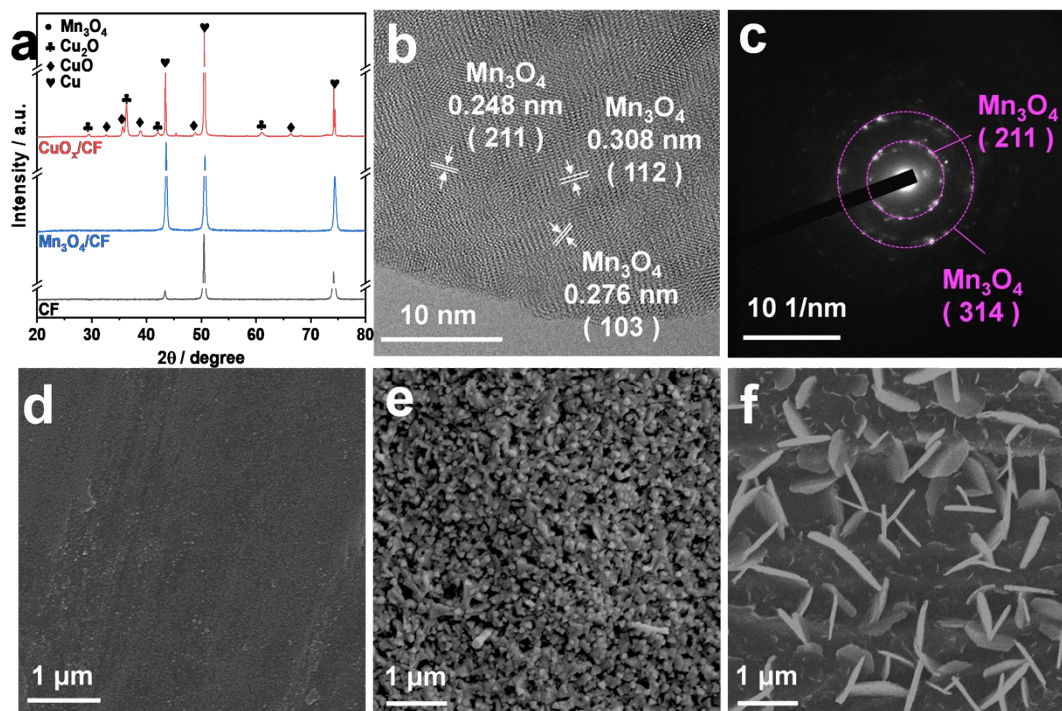

**Fig. S8.** (a) XRD patterns of CF,  $\text{Mn}_3\text{O}_4/\text{CF}$  and  $\text{CuO}_x/\text{CF}$ . (b) HRTEM and (c) SAED pattern of  $\text{Mn}_3\text{O}_4/\text{CF}$ . SEM images of (d) CF, (e)  $\text{CuO}_x/\text{CF}$  and (f)  $\text{Mn}_3\text{O}_4/\text{CF}$ .

Fig. S8a illustrates the XRD patterns of  $\text{CuO}_x/\text{CF}$  and  $\text{Mn}_3\text{O}_4/\text{CF}$ . It can be observed both  $\text{Cu}_2\text{O}$  (JCPDS 05-0667) and  $\text{CuO}$  (JCPDS 45-0937) species were in the  $\text{CuO}_x/\text{CF}$ . Compared to  $\text{Mn}_3\text{O}_4/\text{CF}$  with CF, no obvious  $\text{Mn}_3\text{O}_4$  diffraction peak was observed. In the HRTEM image of  $\text{Mn}_3\text{O}_4/\text{CF}$  (Fig. S8b), the lattice spacings of 0.276, 0.248 and 0.308 nm correspond to (103), (211) and (112) planes of  $\text{Mn}_3\text{O}_4$  (JCPDS 80-0382).<sup>1,2</sup> In addition, the selected area electron diffraction (SAED) pattern in Fig. S8c showed two obvious diffraction rings, which can be assigned to the (314) and (211) planes of  $\text{Mn}_3\text{O}_4$ .<sup>3</sup> Combining the HRTEM and SAED results, it can be confirmed that  $\text{Mn}_3\text{O}_4/\text{CF}$  has been successfully synthesized. Fig S8d-f illustrated the SEM images of CF,  $\text{CuO}_x/\text{CF}$  and  $\text{Mn}_3\text{O}_4/\text{CF}$  samples. Prior to the preparation, the CF substrate showed a relatively smooth surface (Fig S8d). In the  $\text{CuO}_x/\text{CF}$  sample, irregular particulates were clearly observed on the CF surface (Fig. S8e). The  $\text{Mn}_3\text{O}_4/\text{CF}$  sample exhibited the crossed nanosheet morphology on the CF substrate (Fig. S8f).

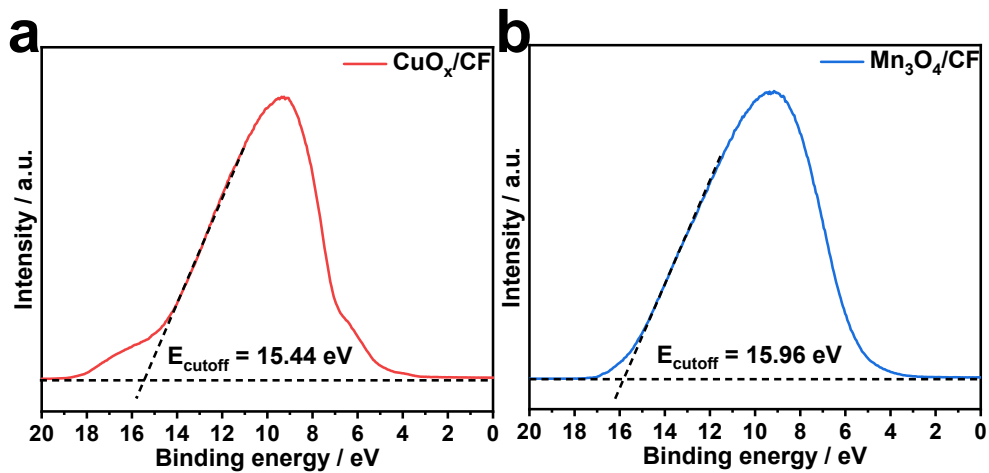

**Fig. S9.** UPS spectra of (a) CuO<sub>x</sub>/CF and (b) Mn<sub>3</sub>O<sub>4</sub>/CF.

The Fermi energy ( $E_F$ ) can be determined by subtracting the binding energy of the secondary cutoff edge of the UPS spectra from the He I excitation energy of 21.22 eV, and then the absolute value of its value is the  $E_F$  of the sample.

**Table S1.** Comparison of the quantitative approaches between UV-Vis spectrophotometry and  $^1\text{H-NMR}$  for nitrate electroreduction at the optimal potential (-0.85 V).

| Quantitative method | Nitrogen sources     | Detected ions                        | Concentration |
|---------------------|----------------------|--------------------------------------|---------------|
| UV-Vis              | $^{14}\text{NO}_3^-$ | $^{14}\text{NH}_4^+ - ^{14}\text{N}$ | 141.59 ppm    |
| $^1\text{H-NMR}$    | $^{14}\text{NO}_3^-$ | $^{14}\text{NH}_4^+ - ^{14}\text{N}$ | 141.21 ppm    |
| $^1\text{H-NMR}$    | $^{15}\text{NO}_3^-$ | $^{15}\text{NH}_4^+ - ^{15}\text{N}$ | 139.60 ppm    |

**Table S2.** The comparison of activity between  $\text{Mn}_3\text{O}_4/\text{CuO}_x/\text{CF}$  and some other reported electrocatalysts.

| Process                                              | Electrocatalysts                               | Electrolytes                                                   | Performance                                                 | Ref.      |
|------------------------------------------------------|------------------------------------------------|----------------------------------------------------------------|-------------------------------------------------------------|-----------|
| Electroreduction of $\text{NO}_3^-$ to $\text{NH}_3$ | $\text{Mn}_3\text{O}_4/\text{CuO}_x/\text{CF}$ | 200 ppm $\text{NO}_3^-$ -N + 0.5 M $\text{Na}_2\text{SO}_4$    | S ( $\text{NH}_3$ ): 97.38%<br>FE ( $\text{NH}_3$ ): 87.56% | This work |
|                                                      | Cu@C                                           | 1 mM $\text{KNO}_3$ + 1 M KOH                                  | FE ( $\text{NH}_3$ ): 72.0%                                 | 4         |
|                                                      | FeNPs@MXene                                    | 100 ppm $\text{NO}_3^-$ -N + 0.5 M $\text{Na}_2\text{SO}_4$    | S ( $\text{NH}_3$ ): 76.8%                                  | 5         |
|                                                      | Fe SAC                                         | 0.5 M $\text{KNO}_3$ + 0.1 M $\text{K}_2\text{SO}_4$ ,         | FE ( $\text{NH}_3$ ): ~ 75%                                 | 6         |
|                                                      | $\text{TiO}_{2-x}$                             | 50 ppm $\text{NO}_3^-$ -N + 0.5 M $\text{Na}_2\text{SO}_4$     | S ( $\text{NH}_3$ ): 87.1%<br>FE ( $\text{NH}_3$ ): 85.0%   | 7         |
|                                                      | Cu/rGO/graphite plate (GP)                     | 0.02 M $\text{NaNO}_3$ + 0.02 M NaCl                           | S ( $\text{NH}_3$ ): 29.93%                                 | 8         |
|                                                      | Pd-Cu/ $\gamma\text{Al}_2\text{O}_3$           | 50 ppm $\text{NO}_3^-$ -N                                      | S ( $\text{NH}_3$ ): 19.6%                                  | 9         |
|                                                      | Cu@ $\text{Cu}_{2+1}\text{O}$ NWs              | 50 ppm $\text{NO}_3^-$ -N + 0.5 M $\text{K}_2\text{SO}_4$ ,    | S ( $\text{NH}_3$ ): 76%                                    | 10        |
|                                                      | CuO- $\text{Co}_3\text{O}_4/\text{Ti}$         | 100 ppm $\text{NO}_3^-$ -N + 0.05 M $\text{Na}_2\text{SO}_4$   | S ( $\text{NH}_3$ ): 44%<br>FE ( $\text{NH}_3$ ): 54.5%     | 11        |
|                                                      | Fe/Cu Composite                                | 100 ppm $\text{NO}_3^-$ -N + 0.05 M $\text{Na}_2\text{SO}_4$   | S ( $\text{NH}_3$ ): 70%                                    | 12        |
|                                                      | $\text{Co}_3\text{O}_4$ - $\text{TiO}_2$ -PVP  | 0.1 M $\text{NaNO}_3$ + 0.1 M $\text{Na}_2\text{SO}_4$         | S ( $\text{NH}_3$ ): 73%                                    | 13        |
|                                                      | $\text{Co}_3\text{O}_4/\text{Ti}$              | 100 ppm $\text{NO}_3^-$ -N + 0.05 M $\text{Na}_2\text{SO}_4$ , | S ( $\text{NH}_3$ ): ~ 70%                                  | 14        |

**Table S3.** The deconvolution result of Cu 2p XPS spectra of Mn<sub>3</sub>O<sub>4</sub>/CuO<sub>x</sub>/CF and CuO<sub>x</sub>/CF samples.

| Sample                                               | Binding Energy (eV)              |      |                  |      |                                  |      |                  |      |
|------------------------------------------------------|----------------------------------|------|------------------|------|----------------------------------|------|------------------|------|
|                                                      | Cu 2p <sub>3/2</sub>             |      |                  |      | Cu 2p <sub>1/2</sub>             |      |                  |      |
|                                                      | Cu <sup>+</sup> /Cu <sup>0</sup> |      | Cu <sup>2+</sup> |      | Cu <sup>+</sup> /Cu <sup>0</sup> |      | Cu <sup>2+</sup> |      |
|                                                      | Mean                             | S.D. | Mean             | S.D. | Mean                             | S.D. | Mean             | S.D. |
| Mn <sub>3</sub> O <sub>4</sub> /CuO <sub>x</sub> /CF | 932.12                           | 0.03 | 934.16           | 0.16 | 952.04                           | 0.04 | 954.08           | 0.17 |
| CuO <sub>x</sub> /CF                                 | 932.31                           | 0.03 | 934.20           | 0.25 | 952.23                           | 0.03 | 954.12           | 0.25 |

Notes: standard deviation (S.D.)

**Table S4.** The deconvolution result of Mn 2p XPS spectra of Mn<sub>3</sub>O<sub>4</sub>/CuO<sub>x</sub>/CF and Mn<sub>3</sub>O<sub>4</sub>/CF samples.

| Sample                                               | Binding Energy (eV)  |      |                  |      |                      |      |                  |      |
|------------------------------------------------------|----------------------|------|------------------|------|----------------------|------|------------------|------|
|                                                      | Mn 2p <sub>3/2</sub> |      |                  |      | Mn 2p <sub>1/2</sub> |      |                  |      |
|                                                      | Mn <sup>2+</sup>     |      | Mn <sup>3+</sup> |      | Mn <sup>2+</sup>     |      | Mn <sup>3+</sup> |      |
|                                                      | Mean                 | S.D. | Mean             | S.D. | Mean                 | S.D. | Mean             | S.D. |
| Mn <sub>3</sub> O <sub>4</sub> /CuO <sub>x</sub> /CF | 640.95               | 0.03 | 642.46           | 0.02 | 652.75               | 0.03 | 654.26           | 0.02 |
| Mn <sub>3</sub> O <sub>4</sub> /CF                   | 640.85               | 0.02 | 642.20           | 0.01 | 652.65               | 0.01 | 654.00           | 0.01 |

Notes: standard deviation (S.D.)

**Table S5.** The deconvolution result of O 1s XPS spectra and the area ratio of Defective-O to Total-O of Mn<sub>3</sub>O<sub>4</sub>/CuO<sub>x</sub>/CF, Mn<sub>3</sub>O<sub>4</sub>/CF and CuO<sub>x</sub>/CF samples.

| Sample                                               | Binding Energy (eV) |      |             |      |            |      | Defective-O/Total-O |      |
|------------------------------------------------------|---------------------|------|-------------|------|------------|------|---------------------|------|
|                                                      | Lattice-O           |      | Defective-O |      | Hydroxyl-O |      | Mean                | S.D. |
|                                                      | Mean                | S.D. | Mean        | S.D. | Mean       | S.D. |                     |      |
| Mn <sub>3</sub> O <sub>4</sub> /CuO <sub>x</sub> /CF | 529.59              | 0.09 | 531.24      | 0.10 | 532.20     | 0.10 | 0.62                | 0.01 |

|                                    |        |      |        |      |        |      |      |      |
|------------------------------------|--------|------|--------|------|--------|------|------|------|
| Mn <sub>3</sub> O <sub>4</sub> /CF | 530.86 | 0.01 | 531.68 | 0.03 | 532.42 | 0.04 | 0.45 | 0.02 |
| CuO <sub>x</sub> /CF               | 529.44 | 0.04 | 530.16 | 0.13 | 531.74 | 0.16 | 0.52 | 0.01 |

Notes: standard deviation (S.D.)

## References

- 1 J. Liu, J. Liu, W. Song, F. Wang and Y. Song, *J. Mater. Chem. A*, 2014, **2**, 17477-17488.
- 2 H. U. Shah, F. Wang, M. S. Javed, N. Shaheen, S. Ali, M. A. Ahmad and K. He, *Mater. Lett.*, 2018, **210**, 148-152.
- 3 S. Zhu, P. Zhang, L. Chang, Y. Zhong, K. Wang, H. Shao, J. Wang, J. Zhang and C. Cao, *Phys. Chem. Chem. Phys.*, 2016, **18**, 8529-8536.
- 4 Z. Song, Y. Liu, Y. Zhong, Q. Guo, J. Zeng and Z. Geng, *Adv. Mater.*, 2022, **34**, 2204306.
- 5 W. J. Sun, L. X. Li, H. Y. Zhang, J. H. He and J. M. Lu, *ACS Sustain. Chem. Eng.*, 2022, **10**, 5958-5965.
- 6 Z. Y. Wu, M. Karamad, X. Yong, Q. Z. Huang, D. A. Cullen, P. Zhu, C. A. Xia, Q. F. Xiao, M. Shakouri, F. Y. Chen, J. Y. Kim, Y. Xia, K. Heck, Y. F. Hu, M. S. Wong, Q. L. Li, I. Gates, S. Siahrostami and H. T. Wang, *Nat. Commun.*, 2021, **12**, 10.
- 7 R. Jia, Y. Wang, C. Wang, Y. Ling, Y. Yu and B. Zhang, *ACS Catal.*, 2020, **10**, 3533-3540.
- 8 E. Rahimi, G. Sajednia, M. Baghdadi and A. Karbassi, *J. Environ. Chem. Eng.*, 2018, **6**, 5249-5258.
- 9 H. Cheng, P. X. Cui, F. R. Wang, L. X. Ding and H. H. Wang, *Angew. Chem.-Int. Edit.*, 2019, **58**, 15541-15547.
- 10 T. L. Ren, K. L. Ren, M. Z. Wang, M. Y. Liu, Z. Q. Wang, H. J. Wang, X. N. Li, L. Wang and Y. Xu, *Chem. Eng. J.*, 2021, **426**, 8.
- 11 M. X. Yang, J. T. Wang, C. D. Shuang and A. M. Li, *Chemosphere*, 2020, **255**, 8.
- 12 Y. M. Zhang, Y. L. Zhao, Z. Chen, L. Q. Wang, L. C. Zhou, P. P. Wu, F. Wang and P. Ou, *J. Electrochem. Soc.*, 2018, **165**, E420-E428.
- 13 J. N. Gao, B. Jiang, C. C. Ni, Y. F. Qi, Y. Q. Zhang, N. Oturan and M. A. Oturan, *Appl. Catal. B-Environ.*, 2019, **254**, 391-402.
- 14 L. H. Su, K. Li, H. B. Zhang, M. H. Fan, D. W. Ying, T. H. Sun, Y. L. Wang and J. P. Jia, *Water Res.*, 2017, **120**, 1-11.
